# Supplementary material
Source: PubMed Central journal article supplement (PMC5094215)
Supplement: SD2.pdf [file SD2.pdf]

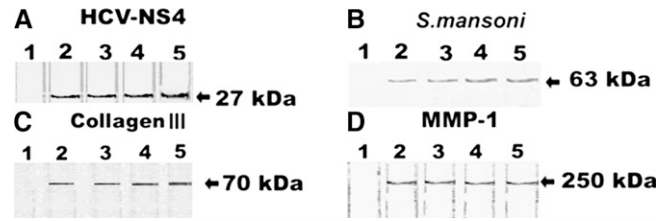

SUPPLEMENTAL FIGURE 1. Identification of hepatitis C virus–nonstructural protein-4 (HCV-NS4) and *Schistosoma mansoni* antigens in addition to collagen III and matrix metalloproteinase-1 (MMP-1) in patients’ sera using Western blot. (A) Samples immunostained with anti-HCV-NS4 monospecific antibody. (B) Samples immunostained with anti-*S. mansoni* monoclonal antibody. (C) Samples immunostained with anti-collagen III monospecific antibody. (D) Samples immunostained with MMP-1 monospecific antibody. Lane 1: healthy individual; Lane 2: patient with F1; Lane 3: patient with F2; Lane 4: patient with F3; Lane 5: patient with F4.
